# Supplementary material for: Procyanidin A2, an anti-diabetic condensed tannin extracted from Wendlandia glabrata, reduces elevated G-6-Pase and mRNA levels in diabetic mice and increases glucose uptake in CC1 hepatocytes and C1C12 myoblast cells
Source: Royal Society of Chemistry journal article supplement (doi:10.1039/c9ra02397f), 2019-01-01

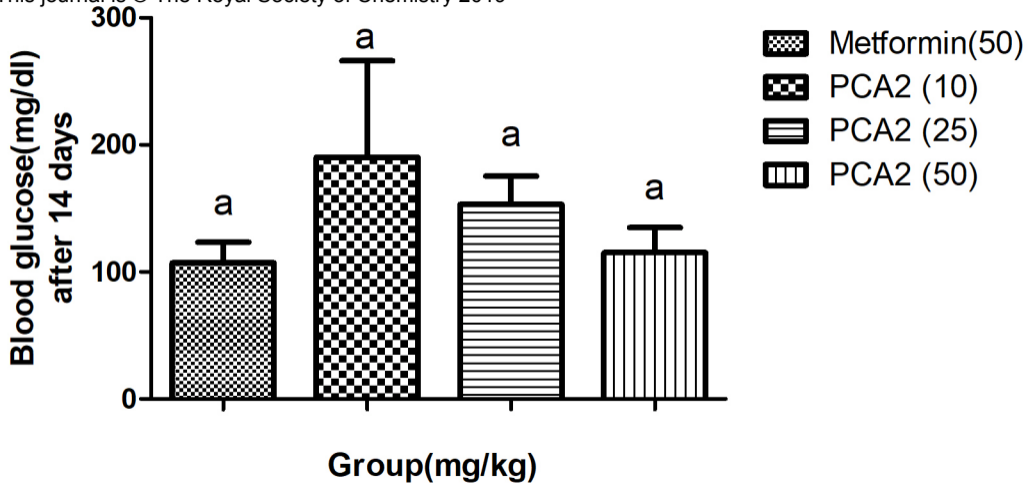

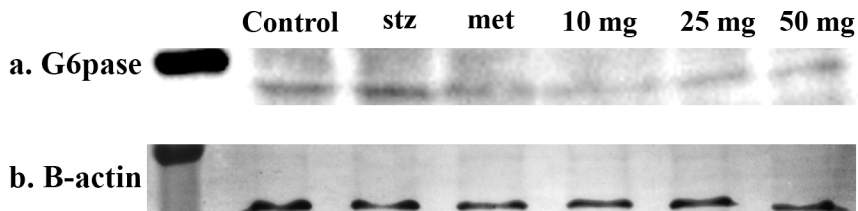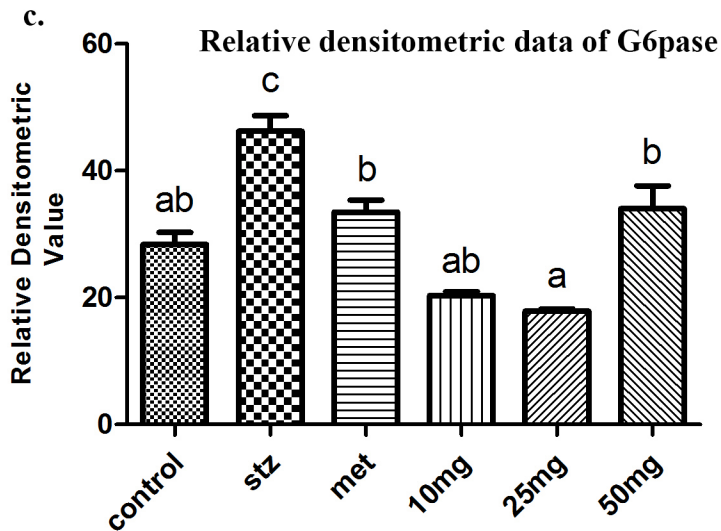

**Immunoblot expression of G6pase and B-actin**

Name of Sample: EB1C1  
Spectrum No.: 3995

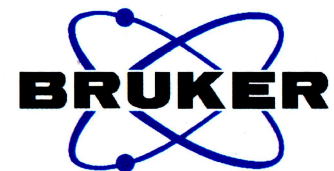

Current Data Parameters  
NAME 3995  
EXPNO 1  
PROCNO 1

F2 - Acquisition Parameters  
Date\_ 20150421  
Time\_ 19.50  
INSTRUM spect  
PROBHD 5 mm PABBO BB/  
PULPROG zg30  
TD 65536  
SOLVENT CD3OD\_SPE  
NS 8  
DS 2  
SWH 10000.000 Hz  
FIDRES 0.152588 Hz  
AQ 3.2767999 sec  
RG 108.7  
DW 50.000 usec  
DE 6.50 usec  
TE 293.8 K  
D1 1.00000000 sec  
TDO 1

==== CHANNEL f1 =====  
SFO1 500.1530886 MHz  
NUC1 1H  
P1 11.75 usec  
PLW1 17.00000000 W

F2 - Processing parameters  
SI 65536  
SF 500.1500153 MHz  
WDW EM  
SSB 0  
LB 0.30 Hz  
GB 0  
PC 1.00

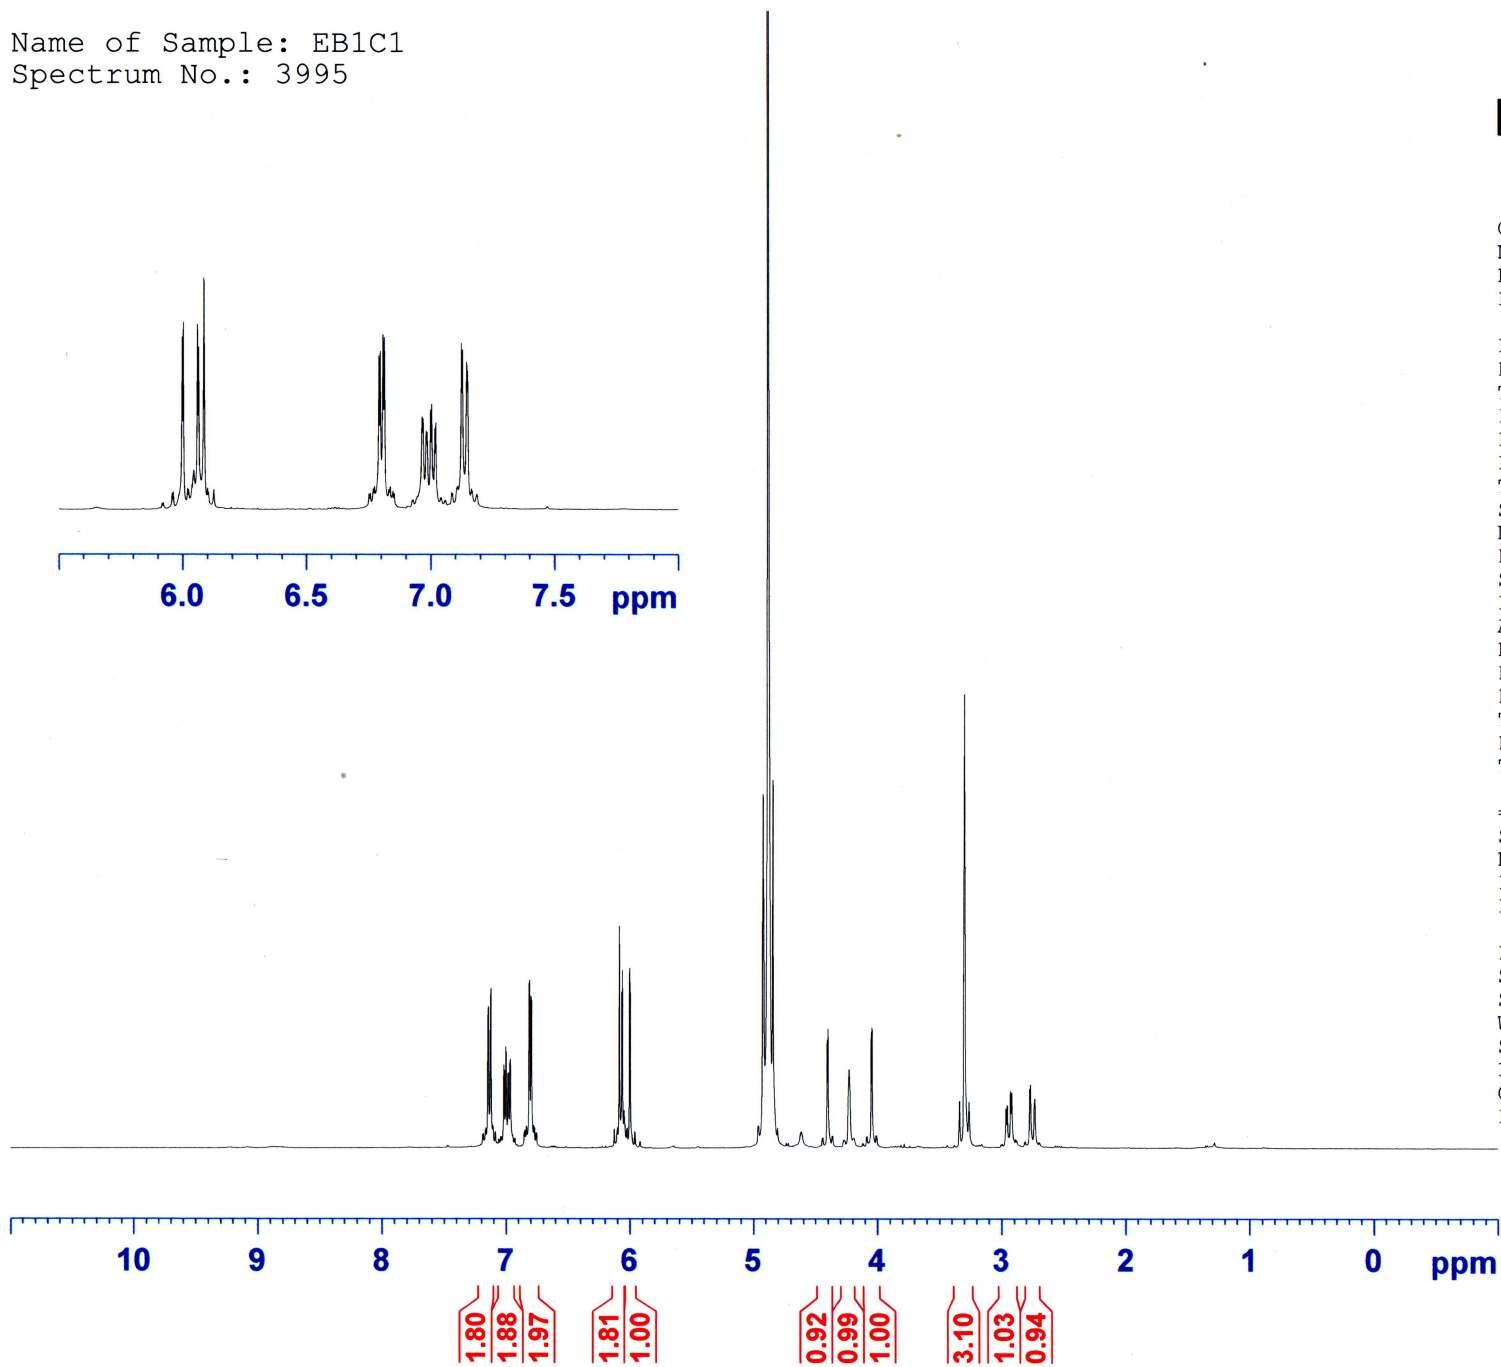

Name of Sample: EB1C1  
Spectrum No.: 3995

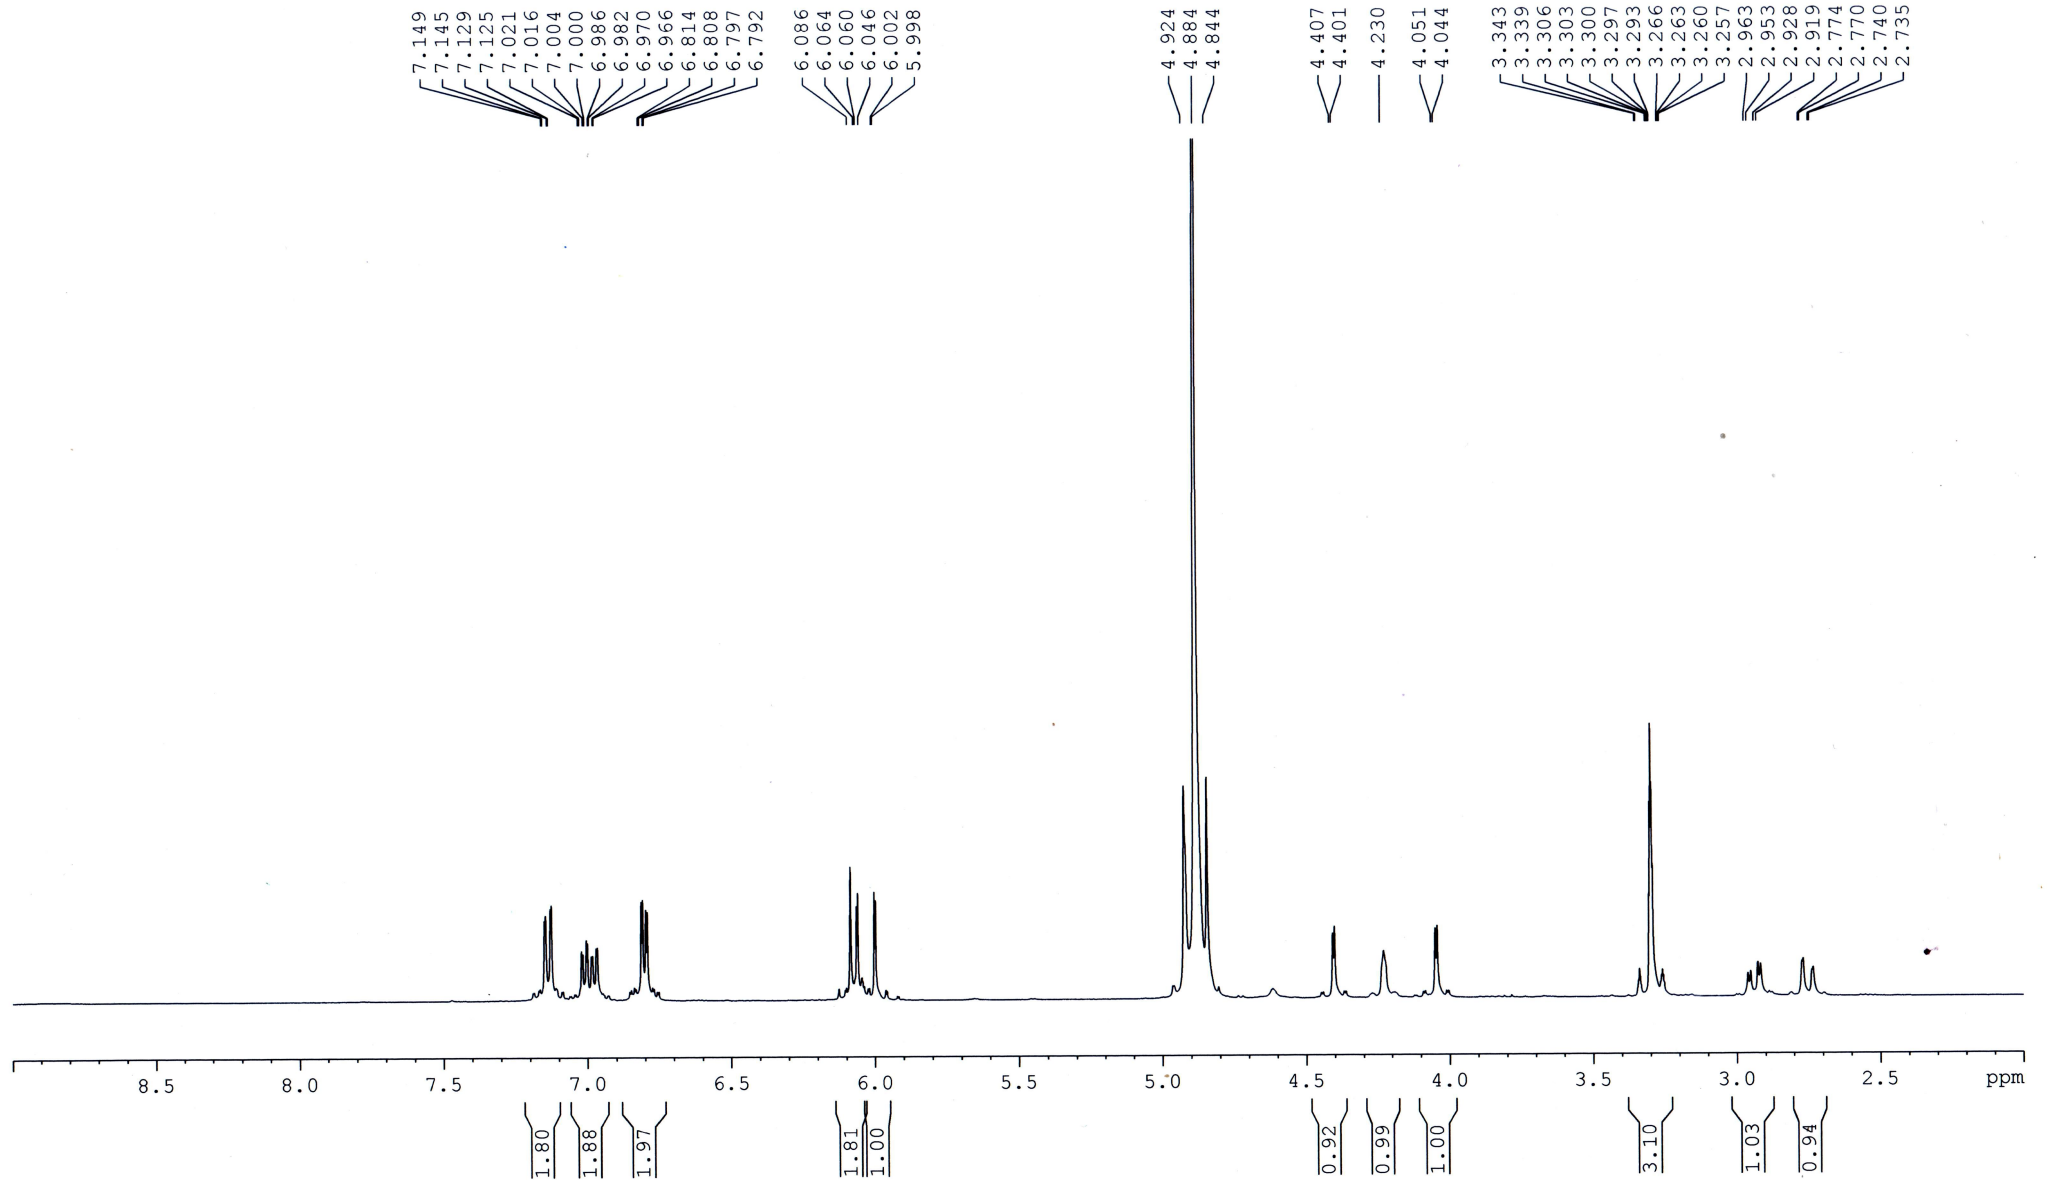

Name of Sample: EB1C1  
Spectrum No.: 3996

156.61  
155.49  
155.09  
152.73  
150.79  
150.63  
145.25  
144.78  
144.47  
144.14

130.93  
129.69

118.84  
118.26  
114.51  
114.40  
114.13  
114.09

105.69  
102.73  
100.89  
98.65  
96.76  
95.09  
94.95

80.24  
66.56  
65.47  
47.99  
47.94  
47.92  
47.90  
47.89  
47.87  
47.82  
47.73  
47.71  
47.70  
47.65  
47.61  
47.59  
47.58  
47.56  
47.55  
47.53  
47.48  
47.42  
47.40  
47.39  
47.37  
47.36  
47.34  
47.31  
47.25  
47.22  
47.14  
47.08  
46.97  
28.39  
27.73

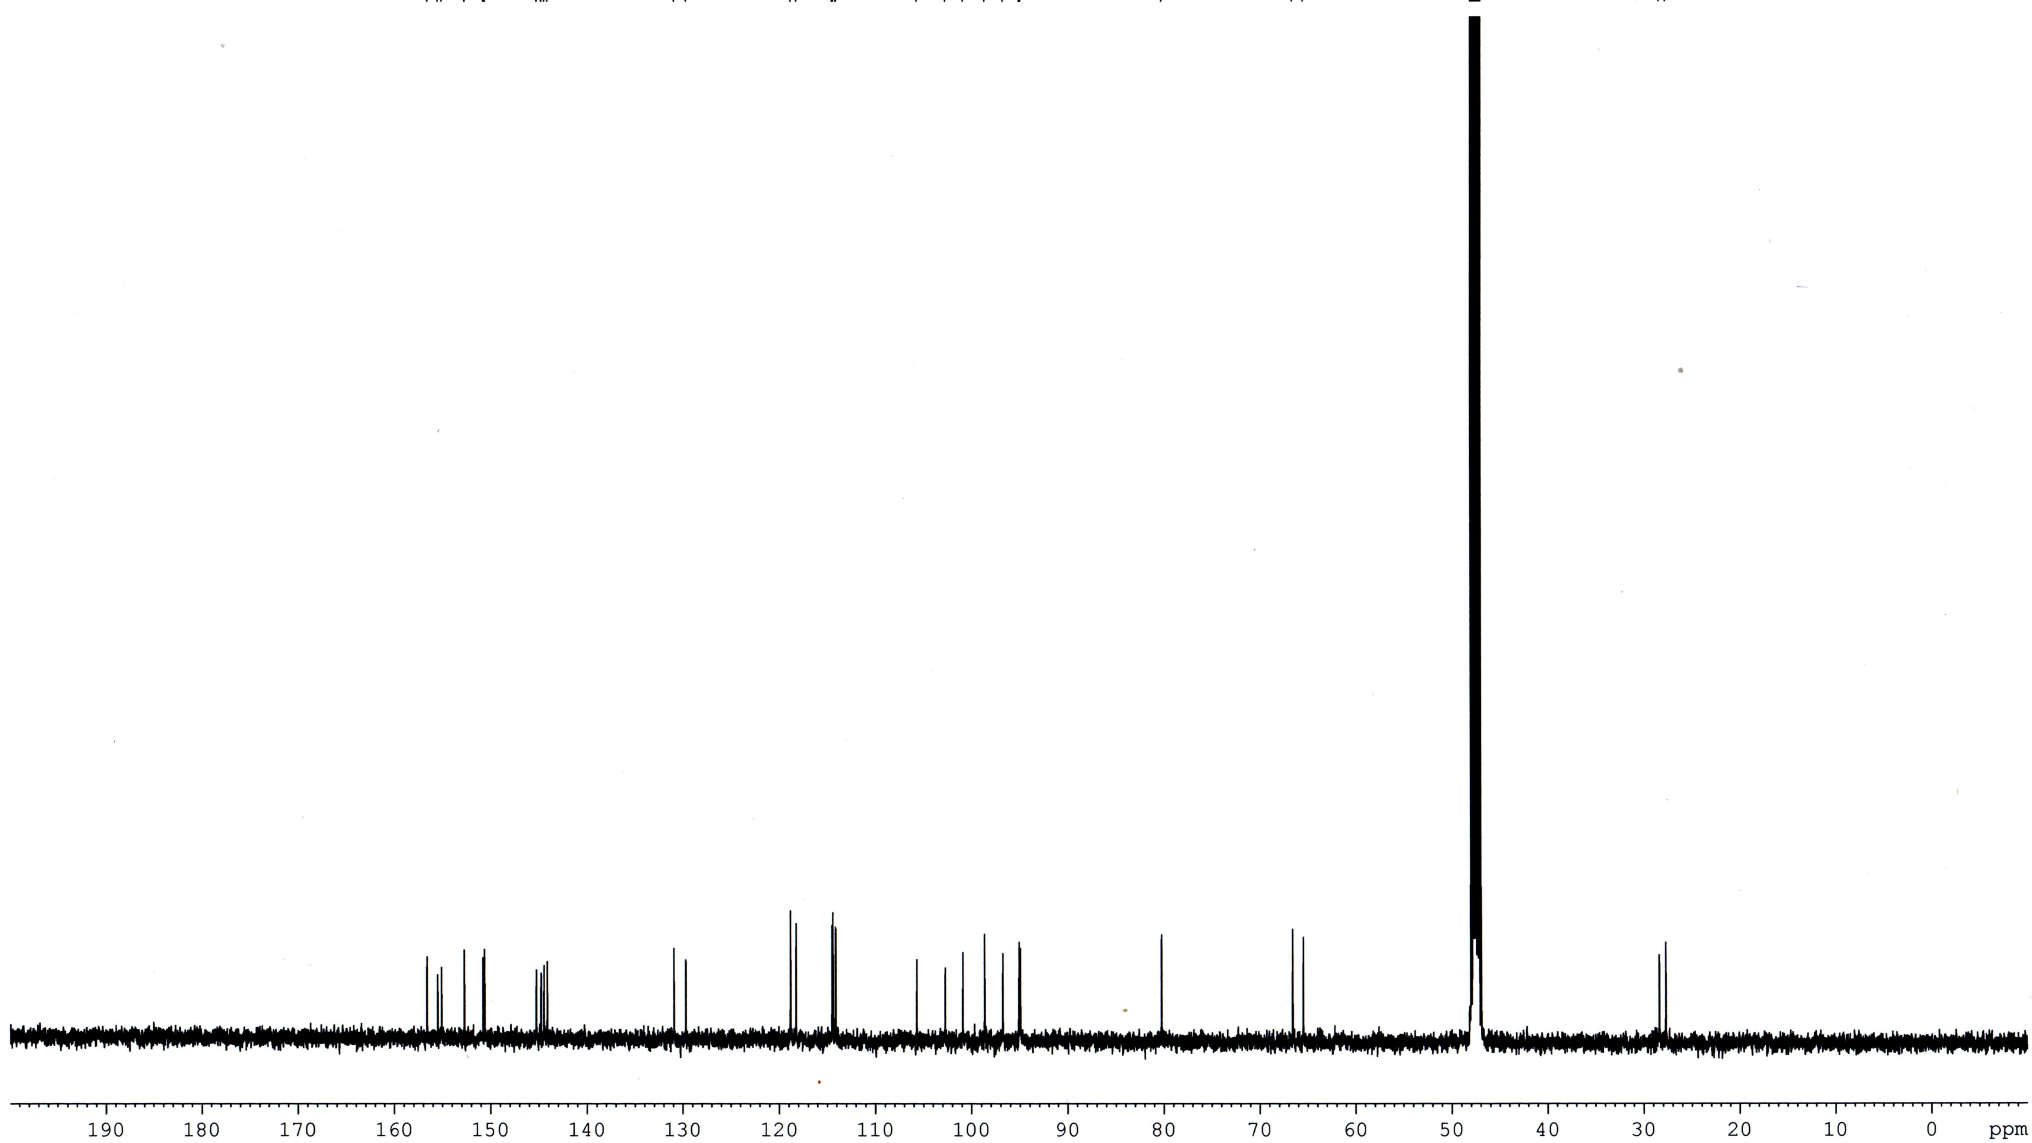

190 180 170 160 150 140 130 120 110 100 90 80 70 60 50 40 30 20 10 0 ppm

EBIC1  
3997

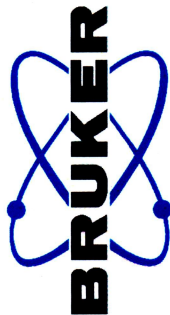

118.97  
118.38  
114.63  
114.52  
114.26  
114.22  
96.88  
95.21  
95.07  
80.36  
66.69  
65.59  
48.23  
48.06  
47.89  
47.72  
47.55  
28.52  
27.86

Current Data Parameters  
NAME 3997  
EXPNO 1  
PROCNO 1

F2 - Acquisition Parameters  
Date\_ 20150421  
Time 20.22  
INSTRUM spect  
PROBHD 5 mm PABBO BB/  
PULPROG deptspl35  
TD 65536  
SOLVENT CD3OD\_SPE  
NS 365  
DS 4  
SWH 20161.291 Hz  
FIDRES 0.307637 Hz  
AQ 1.6252928 sec  
RG 62.74  
DW 24.800 usec  
DE 6.50 usec  
TE 294.2 K  
CNST2 145.0000000  
D1 2.0000000 sec  
D2 0.00344828 sec  
D12 0.00002000 sec  
TD0 1

==== CHANNEL f1 =====  
SFO1 125.7728780 MHz  
NUC1 13C  
P1 10.00 usec  
PLW0 2000.00 usec  
PLW1 84.00000000 W  
SPNAM[5] Crp60comp.4  
SPOALS 0.500  
SPOFFS 0 Hz  
SPW5 12.83399963 W

==== CHANNEL f2 =====  
SFO2 500.1515995 MHz  
NUC2 1H  
CPDPRG[2] waltz16  
P3 11.75 usec  
P4 23.50 usec  
PCPD2 80.00 usec  
PLW2 17.00000000 W  
PLWI2 0.36673000 W

F2 - Processing parameters  
SI 32768  
SF 125.7628180 MHz  
WDW EM  
SSB 0  
LB 1.00 Hz  
GB 0  
PC 1.40

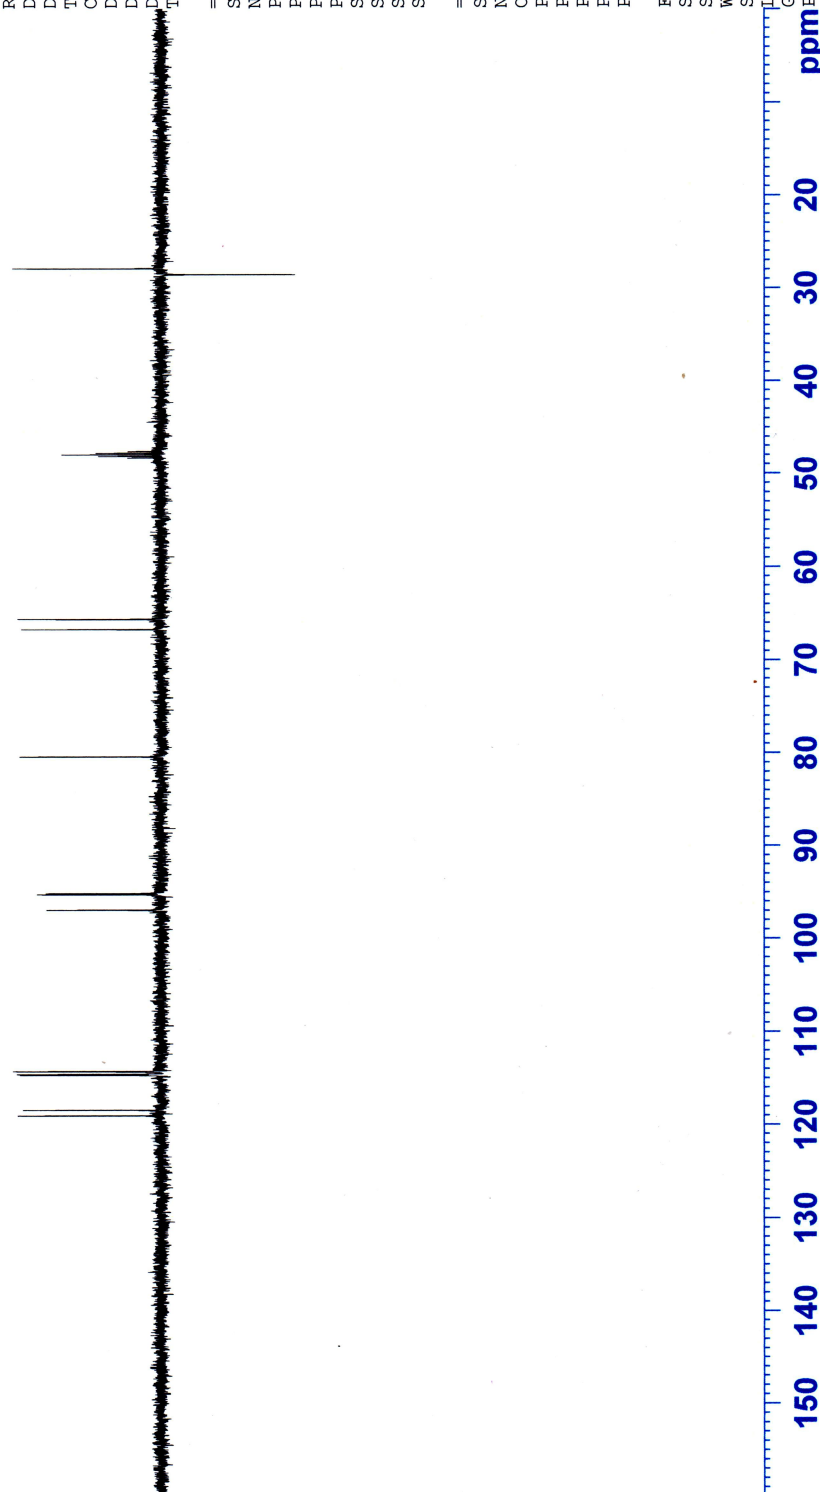

4035  
EB1C1

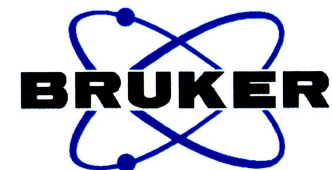

Current Data Parameters  
NAME 4035  
EXPNO 1  
PROCNO 1

F2 - Acquisition Parameters

Date\_ 20150422  
Time 20.00  
INSTRUM spect  
PROBHD 5 mm PABBO BB/  
PULPROG hmqcqpqf  
TD 1024  
SOLVENT CD3OD\_SPE  
NS 4  
DS 16  
SWH 8012.820 Hz  
FIDRES 7.825020 Hz  
AQ 0.0638976 sec  
RG 108.7  
DW 62.400 usec  
DE 6.50 usec  
TE 293.8 K  
CNST2 145.0000000  
D0 0.00000300 sec  
D1 1.50000000 sec  
D2 0.00344828 sec  
D12 0.00002000 sec  
D13 0.00000400 sec  
D16 0.00020000 sec  
IN0 0.00001890 sec

ppm

20

40

60

80

100

120

140

160

ppm

=====  
SFO1 500.1522661 MHz  
NUC1 1H  
P1 11.75 usec  
P2 23.50 usec  
PLW1 17.00000000 W

=====  
SFO2 125.7722491 MHz  
NUC2 13C  
CPDPRG[2] garp  
P3 10.00 usec  
PCPD2 70.00 usec  
PLW2 84.00000000 W  
PLW12 1.71430004 W

=====  
GPNAM[1] SMSQ10.100  
GPNAM[2] SMSQ10.100  
GPNAM[3] SMSQ10.100  
GPZ1 50.00 %  
GPZ2 30.00 %  
GPZ3 40.10 %  
P16 1000.00 usec

F1 - Acquisition parameters  
TD 128  
SFO1 125.7722 MHz  
FIDRES 206.679901 Hz  
SW 210.341 ppm  
FrMODE QF

F2 - Processing parameters  
SI 1024  
SF 500.1500000 MHz  
WDW QSINE  
SSB 2  
LB 0 Hz  
GB 0  
PC 1.40

F1 - Processing parameters  
SI 1024  
MC2 QF  
SF 125.7628180 MHz  
WDW QSINE  
SSB 2  
LB 0 Hz  
GB 0

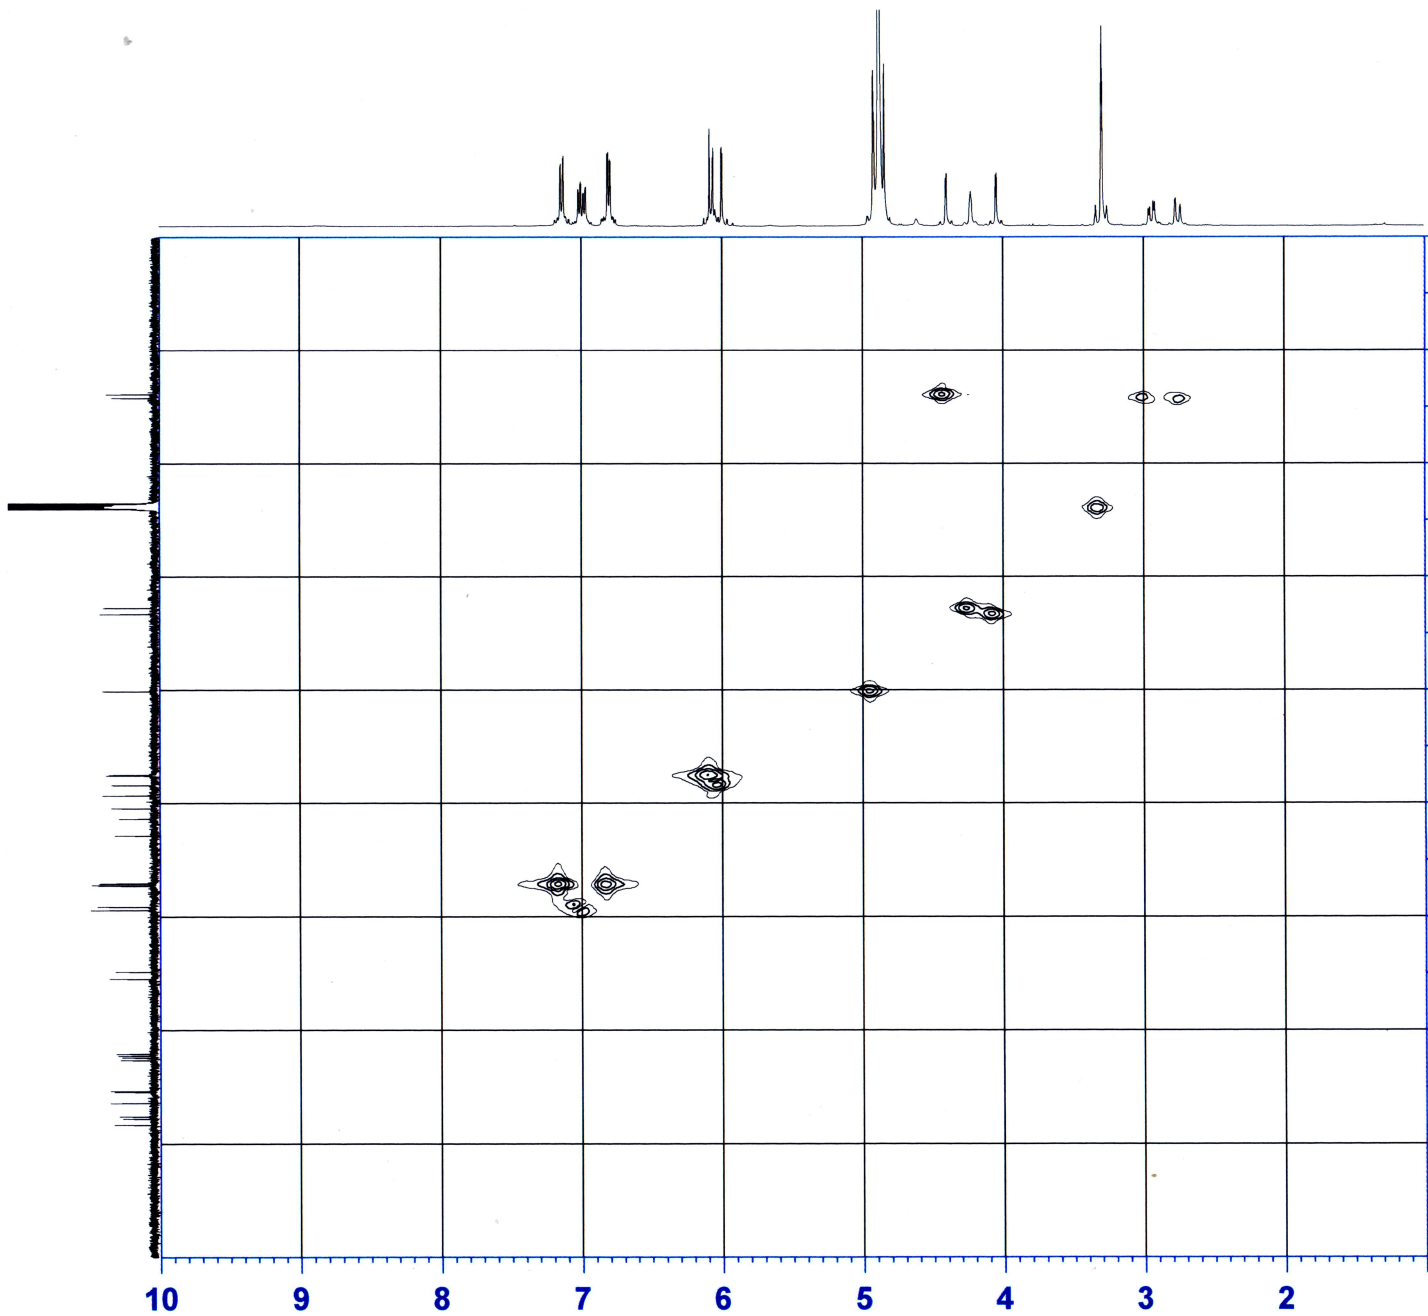

EB1C1  
4034

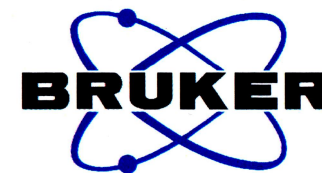

Current Data Parameters  
NAME 4034  
EXPNO 1  
PROCNO 1

F2 - Acquisition Parameters  
Date\_ 20150422  
Time 19.28  
INSTRUM spect  
PROBHD 5 mm PABBO BB/  
PULPROG hmbcgp1pndqf  
TD 2048  
SOLVENT CD3OD\_SPE  
NS 4  
DS 16  
SWH 8012.820 Hz  
FIDRES 3.912510 Hz  
AQ 0.1277952 sec  
RG 108.7  
DW 62.400 usec  
DE 6.50 usec  
TE 294.0 K  
CNST2 145.0000000  
CNST13 10.0000000  
D0 0.00000300 sec  
D1 1.50000000 sec  
D2 0.00344828 sec  
D6 0.05000000 sec  
D16 0.00020000 sec  
IN0 0.00001790 sec

===== CHANNEL f1 =====  
SFO1 500.1531509 MHz  
NUC1 1H  
P1 11.75 usec  
P2 23.50 usec  
PLW1 17.00000000 W

===== CHANNEL f2 =====  
SFO2 125.7753732 MHz  
NUC2 13C  
P3 10.00 usec  
PLW2 84.00000000 W

===== GRADIENT CHANNEL =====  
GPNAM[1] SMSQ10.100  
GPNAM[2] SMSQ10.100  
GPNAM[3] SMSQ10.100  
GPZ1 50.00 %  
GPZ2 30.00 %  
GPZ3 40.10 %  
P16 1000.00 usec

F1 - Acquisition parameters  
TD 128  
SFO1 125.7754 MHz  
FIDRES 218.226257 Hz  
SW 222.086 ppm  
FnMODE QF

F2 - Processing parameters  
SI 2048  
SF 500.1500000 MHz  
WDW SINE  
SSB 0  
LB 0 Hz  
GB 0  
PC 1.40

F1 - Processing parameters  
SI 1024  
MC2 QF  
SF 125.7628180 MHz  
WDW SINE  
SSB 0  
LB 0 Hz  
GB 0

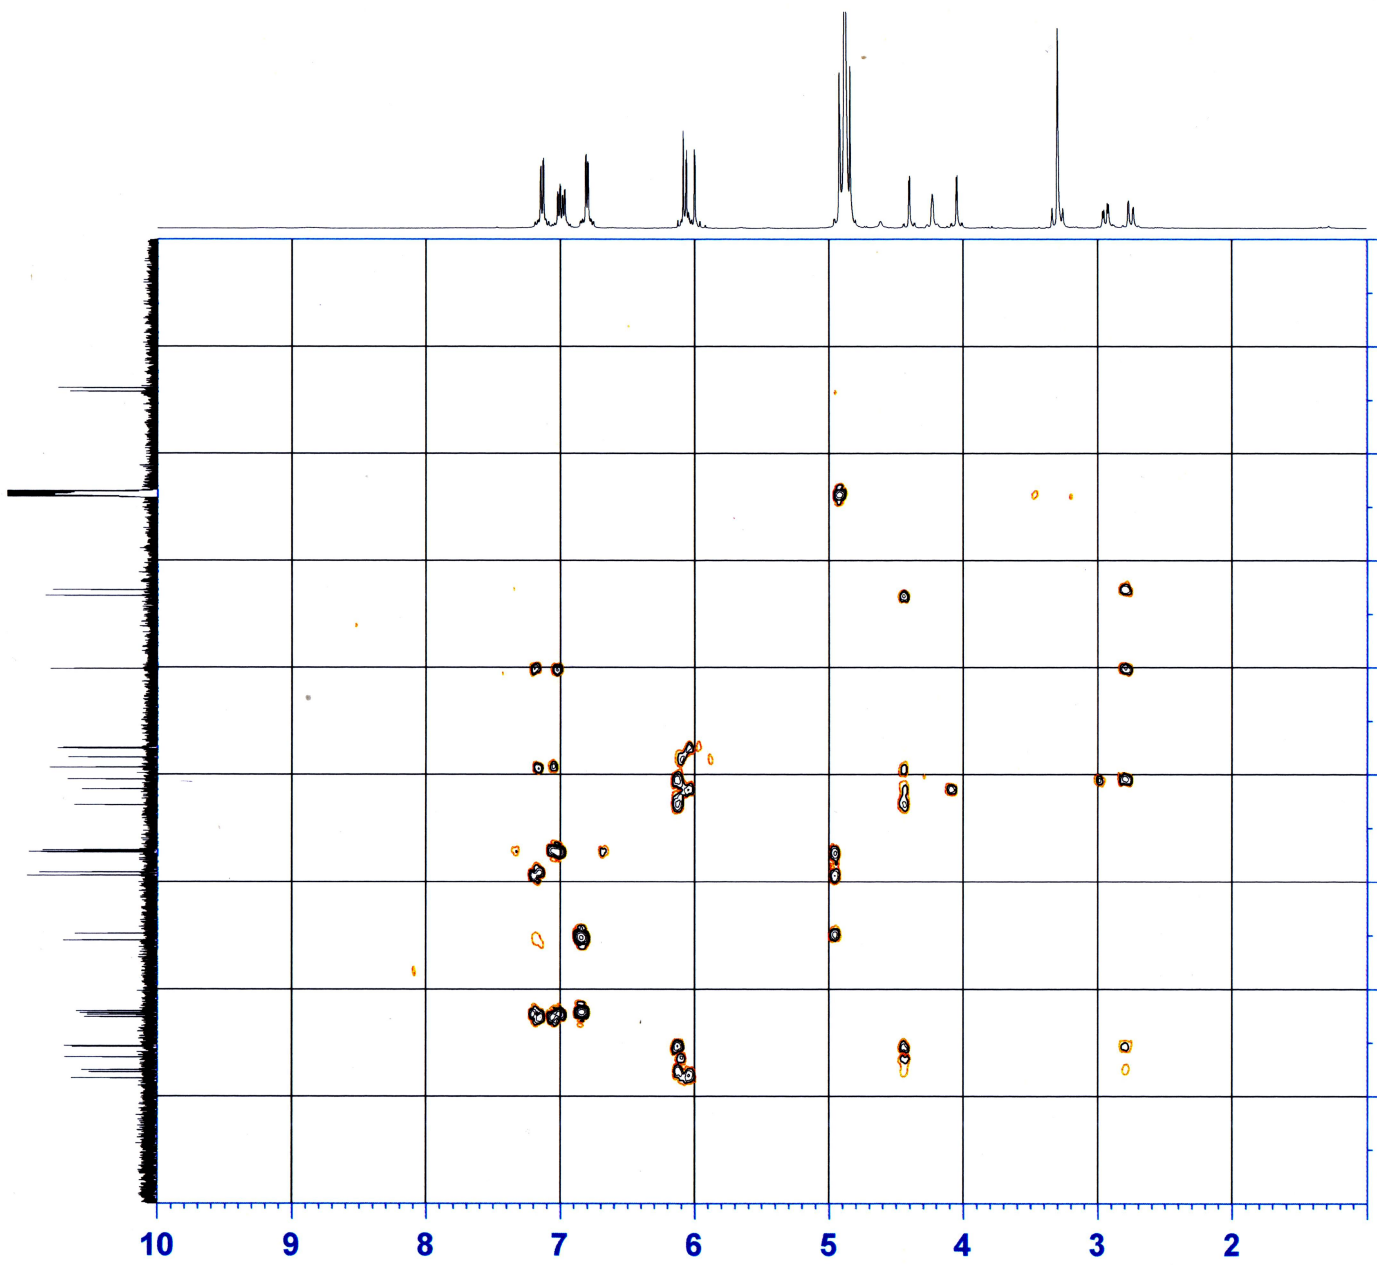

Supplement: c9ra02397f1.pdf [file c9ra02397f1.pdf]
